# Supplementary material for: In situsynthesis of iron sulfide embedded porous carbon hollow spheres for sodium ion batteries
Source: Royal Society of Chemistry journal article supplement (doi:10.1039/c7nr06886g), 2017-01-01
Supplement: c7nr06886g1.pdf [file c7nr06886g1.pdf]

***Electronic Supplementary Information (ESI)***

**In-situ synthesis of iron sulfide embedded porous carbon hollow  
spheres for sodium ion battery**

Yuanzhong Tan, Ka-Wai Wong, Zhiling Zhang and Ka Ming Ng\*

Department of Chemical and Biological Engineering, The Hong Kong University of  
Science and Technology, Hong Kong, China.

\* Corresponding author; Email: [kekmng@ust.hk](mailto:kekmng@ust.hk); Fax: 852-23580054; Tel: 852-  
23587238

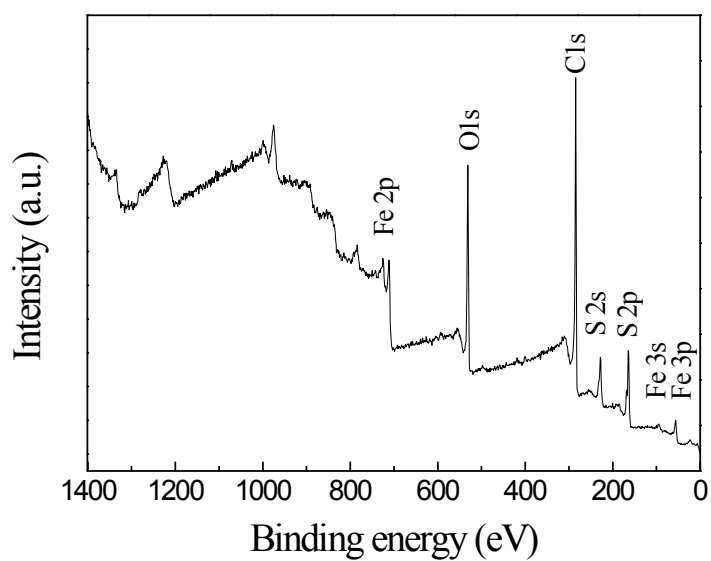

**Fig. S1** XPS spectrum of  $\text{FeS}_x\text{@CS}$ .

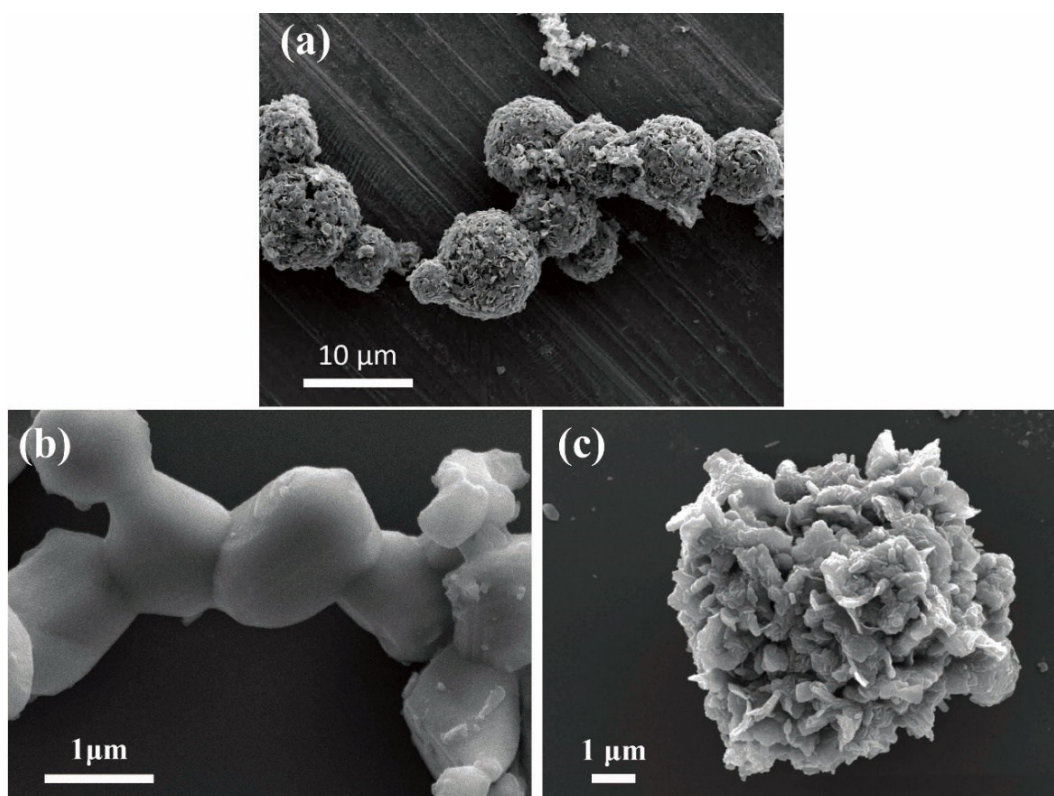

**Fig. S2** SEM images of (a)  $\text{FeS}_x\text{@CS}$ , (b)  $\text{FeS}_x$  particles and (c) Carbon coated iron sulfide nanoparticles synthesized without adding PF-127.

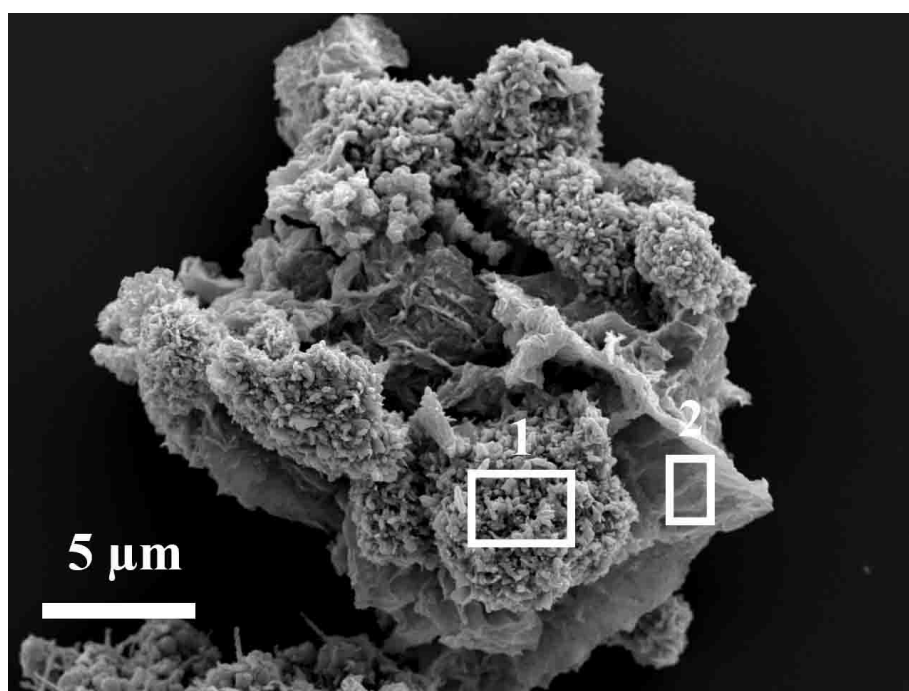

**Fig. S3** SEM image of product when NaG was replaced by glucose.

**Table. S1** Elemental analysis of selective areas in Fig. S3

| Element | Spectrum 1             |       | Spectrum 2             |       |
|---------|------------------------|-------|------------------------|-------|
|         | Apparent Concentration | Wt%   | Apparent Concentration | Wt%   |
| C       | 0.19                   | 19.47 | 0.20                   | 23.59 |
| O       | 0.65                   | 7.66  | 0.58                   | 13.05 |
| S       | 2.51                   | 26.75 | 0.37                   | 8.94  |
| Fe      | 3.83                   | 46.12 | 2.48                   | 54.42 |

The nanofibers found on the surface of  $\text{FeS}_x$  electrode after 5 charge-discharge cycles were investigated with SEM EDX elemental analysis. As shown in Table S2, the observation of Si and O indicated such nanofibers were glass fibers ripped down from the separator, which was glass-fiber filter paper.

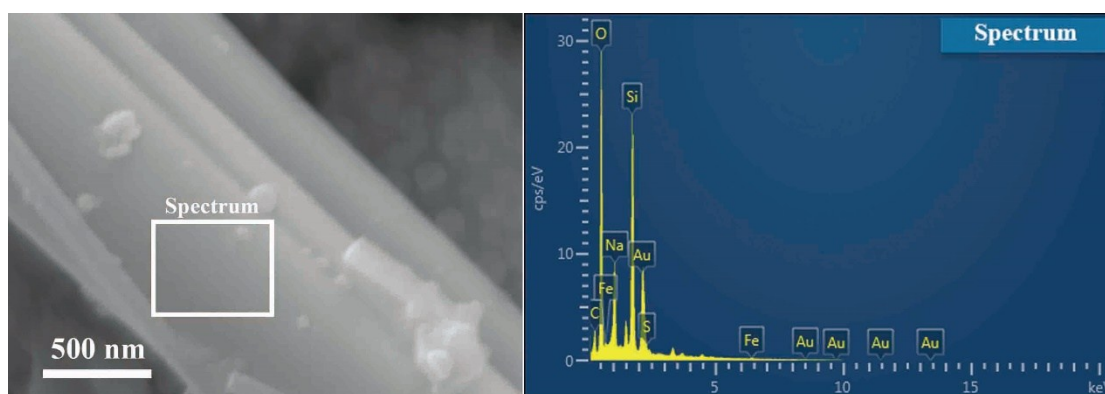

**Fig. S4** SEM EDS elemental analysis of selective area of nanofibers observed on the surface of  $\text{FeS}_x$  electrode after 5 cycles.

**Table. S2** Elemental analysis of selective area of nanofibers observed on the surface of  $\text{FeS}_x$  electrode after 5 cycles.

| Element | Apparent Concentration | Wt%   | Atomic % |
|---------|------------------------|-------|----------|
| C       | 0.24                   | 11.77 | 20.50    |
| O       | 5.32                   | 37.49 | 49.01    |
| Na      | 1.31                   | 10.28 | 9.35     |
| Si      | 1.66                   | 15.47 | 11.52    |
| S       | 0.11                   | 1.19  | 0.77     |
| Fe      | 1.89                   | 22.28 | 8.34     |
| Cu      | 0.07                   | 1.52  | 0.50     |
